# Supplementary material for: Accumulation of stabilin-1 positive macrophages in the early stage of gastric cancer is associated with short cumulative survival
Source: PubMed Central journal article supplement — Oncol Lett. 2020 Jan 16;19(3):2404–12. doi: 10.3892/ol.2020.11310 (PMC7039161; doi:10.3892/ol.2020.11310), 2020-01-16
Supplement: Supplementary_Data.pdf [file Supplementary_Data.pdf]

Figure S1. Association between stabilin-1 expression in TNM stage II-IV gastric cancer and cumulative patient survival. Kaplan-Meier analysis and a log rank test were used to compare patient survival with low and high numbers of intratumoral stabilin-1-positive cells. The cutoff value for determining stabilin-1 expression as low and high expression was 8.0 cells. The association between stabilin-1 expression with patient survival in (A) TNM stage II ( $P=0.52$ ), (B) TNM stage III ( $P=0.235$ ) and (C) TNM stage IV ( $P=0.63$ ) gastric cancer. TNM, Tumor-Stage-Metastasis.

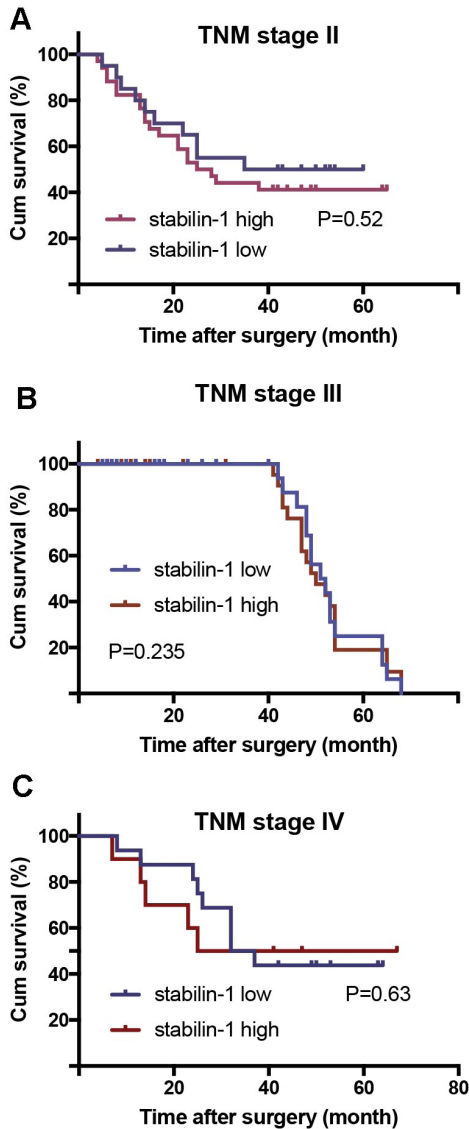

Table SI. Comparison of demographic and clinical information between gastric cancer tissue and non-cancerous gastric tissue.

| Demographic and clinical information         | Gastric cancer tissue, n | Non-cancerous gastric tissue, n | P-value |
|----------------------------------------------|--------------------------|---------------------------------|---------|
| Age                                          |                          |                                 | 0.024   |
| ≥60 years                                    | 210                      | 18                              |         |
| <60 years                                    | 121                      | 22                              |         |
| Sex                                          |                          |                                 | 0.434   |
| Male                                         | 246                      | 32                              |         |
| Female                                       | 85                       | 8                               |         |
| Smoking history                              |                          |                                 | 0.177   |
| Yes                                          | 152                      | 14                              |         |
| No                                           | 162                      | 24                              |         |
| Alcohol intake                               |                          |                                 | 0.589   |
| Yes                                          | 130                      | 14                              |         |
| No                                           | 184                      | 24                              |         |
| Family history of gastric cancer             |                          |                                 | 0.863   |
| Yes                                          | 36                       | 4                               |         |
| No                                           | 278                      | 34                              |         |
| Tumor size                                   |                          |                                 | 0.056   |
| <5 cm                                        | 154                      | 25                              |         |
| ≥5 cm                                        | 177                      | 15                              |         |
| Tumor location                               |                          |                                 | 0.886   |
| Cardia                                       | 179                      | 20                              |         |
| Corpora ventriculi                           | 75                       | 10                              |         |
| Sinuses ventriculi                           | 77                       | 10                              |         |
| Tumor differentiation                        |                          |                                 | 0.439   |
| Poor                                         | 155                      | 16                              |         |
| Medium                                       | 92                       | 15                              |         |
| High                                         | 84                       | 9                               |         |
| Pathological type                            |                          |                                 | 0.151   |
| Poorly differentiated adenocarcinoma         | 97                       | 6                               |         |
| Tubular papillary adenocarcinoma             | 165                      | 23                              |         |
| Signet ring cell and mucinous adenocarcinoma | 69                       | 11                              |         |
| TNM stage                                    |                          |                                 | 0.361   |
| I                                            | 53                       | 6                               |         |
| II                                           | 101                      | 15                              |         |
| III                                          | 133                      | 11                              |         |
| IV                                           | 44                       | 8                               |         |
| Cancer embolus                               |                          |                                 | 0.747   |
| Yes                                          | 65                       | 7                               |         |
| No                                           | 266                      | 33                              |         |
| Lymph node metastasis                        |                          |                                 | 0.535   |
| Yes                                          | 207                      | 23                              |         |
| No                                           | 124                      | 17                              |         |
| Remote metastasis                            |                          |                                 | 0.248   |
| M0                                           | 287                      | 32                              |         |
| M1                                           | 44                       | 8                               |         |
| T stage                                      |                          |                                 | 0.865   |
| T1                                           | 29                       | 2                               |         |
| T2                                           | 38                       | 5                               |         |
| T3                                           | 154                      | 20                              |         |
| T4                                           | 110                      | 13                              |         |
| N stage                                      |                          |                                 | 0.550   |
| N0                                           | 124                      | 17                              |         |
| N1                                           | 78                       | 8                               |         |
| N2                                           | 63                       | 10                              |         |
| N3                                           | 66                       | 5                               |         |

TNM, Tumor-Node-Metastasis. A  $\chi^2$  test was used to analyze significant difference.

Table SII. Comparison of demographic and clinical information between 169 patients in the follow-up group and 202 patients in lost-to-follow-up group.

| Demographic and clinical information         | Follow-up group (n) | Lost to follow-up group (n) | P-value |
|----------------------------------------------|---------------------|-----------------------------|---------|
| Age                                          |                     |                             | 0.81    |
| ≥60 years                                    | 105                 | 123                         |         |
| <60 years                                    | 64                  | 79                          |         |
| Sex                                          |                     |                             | 0.69    |
| Male                                         | 125                 | 153                         |         |
| Female                                       | 44                  | 49                          |         |
| Smoking history                              |                     |                             | 0.58    |
| Yes                                          | 73                  | 93                          |         |
| No                                           | 91                  | 95                          |         |
| Alcohol intake                               |                     |                             | 0.93    |
| Yes                                          | 66                  | 78                          |         |
| No                                           | 98                  | 110                         |         |
| Family history of gastric cancer             |                     |                             | 0.008   |
| Yes                                          | 11                  | 29                          |         |
| No                                           | 153                 | 159                         |         |
| Tumor size                                   |                     |                             | 0.76    |
| <5 cm                                        | 83                  | 96                          |         |
| ≥5 cm                                        | 86                  | 106                         |         |
| Tumor location                               |                     |                             | 0.77    |
| Cardia                                       | 90                  | 109                         |         |
| Corpora ventriculi                           | 40                  | 45                          |         |
| Sinuses ventriculi                           | 39                  | 48                          |         |
| Tumor differentiation                        |                     |                             | 0.29    |
| Poor                                         | 81                  | 90                          |         |
| Medium                                       | 42                  | 65                          |         |
| High                                         | 46                  | 47                          |         |
| Pathological type                            |                     |                             | 0.17    |
| Poorly differentiated adenocarcinoma         | 53                  | 50                          |         |
| Tubular papillary adenocarcinoma             | 86                  | 102                         |         |
| Signet ring cell and mucinous adenocarcinoma | 30                  | 50                          |         |
| TNM stage                                    |                     |                             | 0.86    |
| I                                            | 25                  | 34                          |         |
| II                                           | 54                  | 62                          |         |
| III                                          | 64                  | 80                          |         |
| IV                                           | 26                  | 26                          |         |
| Cancer embolus                               |                     |                             | 0.32    |
| Yes                                          | 29                  | 43                          |         |
| No                                           | 140                 | 159                         |         |
| Lymph node metastasis                        |                     |                             | 0.42    |
| Yes                                          | 101                 | 129                         |         |
| No                                           | 68                  | 73                          |         |
| Remote metastasis                            |                     |                             | 0.32    |
| M0                                           | 142                 | 177                         |         |
| M1                                           | 27                  | 25                          |         |
| T stage                                      |                     |                             | 0.78    |
| T1                                           | 14                  | 17                          |         |
| T2                                           | 17                  | 26                          |         |
| T3                                           | 78                  | 96                          |         |
| T4                                           | 60                  | 63                          |         |
| N stage                                      |                     |                             | 0.30    |
| N0                                           | 68                  | 73                          |         |
| N1                                           | 31                  | 55                          |         |
| N2                                           | 34                  | 39                          |         |
| N3                                           | 35                  | 36                          |         |

TNM, Tumor-Node-Metastasis. A  $\chi^2$  test was used to analyze the differences.

Table SIII. Associations between clinicopathological features and the number of CD68<sup>+</sup> cells in primary gastric adenocarcinoma.

| Clinicopathological features                 | Cases, n | CD68 <sup>+</sup> cells, median (interquartile range) | P-value |
|----------------------------------------------|----------|-------------------------------------------------------|---------|
| Sex                                          |          |                                                       | 0.176   |
| Male                                         | 278      | 17.0 (11.0-26.4)                                      |         |
| Female                                       | 93       | 15.0 (9.1-23.5)                                       |         |
| Age                                          |          |                                                       | 0.374   |
| <60 years                                    | 143      | 17.4 (11.6-28.2)                                      |         |
| ≥60 years                                    | 228      | 15.7 (10.4-23.6)                                      |         |
| Diameter                                     |          |                                                       | 0.869   |
| <5 cm                                        | 179      | 16.4 (10.9-25.8)                                      |         |
| ≥5 cm                                        | 192      | 16.2 (10.4-25.0)                                      |         |
| Tumor location                               |          |                                                       | 0.676   |
| Cardia                                       | 199      | 15.6 (10-26.4)                                        |         |
| Corpora ventriculi                           | 85       | 17.0 (10.0-26.4)                                      |         |
| Sinuses ventriculi                           | 87       | 17.4 (11.2-26.8)                                      |         |
| Differentiation degree                       |          |                                                       | 0.002   |
| Poor                                         | 171      | 19.2 (12.4-28.2)                                      |         |
| Medium                                       | 107      | 16.8 (10.4-27.0)                                      |         |
| Well                                         | 93       | 13.0 (10.0-19.9)                                      |         |
| Pathological type                            |          |                                                       | 0.247   |
| Poorly differentiated adenocarcinoma         | 103      | 18.4 (9.8-32.4)                                       |         |
| Tubular papillary adenocarcinoma             | 188      | 15.6 (10.9-23.9)                                      |         |
| Signet ring cell and mucinous adenocarcinoma | 80       | 17.2 (10.6-23.9)                                      |         |
| Cancer embolus                               |          |                                                       | 0.693   |
| Negative                                     | 299      | 17.0 (10.4-25.2)                                      |         |
| Positive                                     | 72       | 15.1 (10.5-27.3)                                      |         |
| Nodal metastasis                             |          |                                                       | 0.264   |
| No                                           | 141      | 17.8 (11.6-26.0)                                      |         |
| Yes                                          | 230      | 15.7 (10.0-25.3)                                      |         |
| Serosa invasion                              |          |                                                       | 0.171   |
| No                                           | 74       | 19.0 (12.3-26.5)                                      |         |
| Yes                                          | 297      | 15.7 (10.3-24.4)                                      |         |
| T stages                                     |          |                                                       | 0.604   |
| T1                                           | 31       | 20.4 (10.2-28.2)                                      |         |
| T2                                           | 43       | 19.0 (12.6-24.6)                                      |         |
| T3                                           | 174      | 15.6 (10.0-26.9)                                      |         |
| T4                                           | 123      | 15.8 (10.8-24.2)                                      |         |
| N stages                                     |          |                                                       | 0.543   |
| N0                                           | 141      | 17.8 (11.6-26.0)                                      |         |
| N1                                           | 86       | 16.8 (10.8-28.4)                                      |         |
| N2                                           | 73       | 15.8 (9.9-24.1)                                       |         |
| N3                                           | 71       | 14.4 (10.4-22.6)                                      |         |
| Distant metastasis                           |          |                                                       | 0.237   |
| M0                                           | 319      | 16.5 (11.0-26.3)                                      |         |
| M1                                           | 52       | 15.4 (9.1-22.3)                                       |         |
| TNM stage                                    |          |                                                       | 0.431   |
| I                                            | 59       | 19.6 (11.6-27.2)                                      |         |
| II                                           | 116      | 17.5 (10.6-27.0)                                      |         |
| III                                          | 144      | 15.6 (10.9-25.2)                                      |         |
| IV                                           | 52       | 16.0 (9.0-22.4)                                       |         |
| Smoking                                      |          |                                                       | 0.981   |
| No                                           | 186      | 16.0 (9.9-26.9)                                       |         |
| Yes                                          | 166      | 16.1 (10.7-23.3)                                      |         |
| Alcohol consumption                          |          |                                                       | 0.543   |
| No                                           | 208      | 15.8 (10.0-25.5)                                      |         |
| Yes                                          | 144      | 16.6 (11.0-24.9)                                      |         |
| Family history                               |          |                                                       | 0.343   |
| No                                           | 312      | 16.7 (10.5-26.2)                                      |         |
| Yes                                          | 40       | 14.7 (9.3-24.6)                                       |         |

TNM, Tumor-Node-Metastasis. Mann-Whitney U test or Kruskal-Wallis test was used to compare the differences.
